# Supplementary material
Source: Research Square preprint supplement (doi:10.21203/rs.3.rs-8958661/v1)
Supplement: Supplementary file 1 [file d1ef1c2e6c9ddb69f11c98c4.docx]

**Table 1. Age-adjusted mortality rates per 100,000, stratified by sex in the United States, 1999 to 2025.**

| **Year** | **Age-Adjusted Mortality Rate (95% CI) Overall** | **Age-Adjusted Mortality Rate (95% CI) Male** | **Age-Adjusted Mortality Rate (95% CI) Female** |
| --- | --- | --- | --- |
| 1999 | 0.67 (0.64, 0.70) | 0.78 (0.72, 0.83) | 0.60 (0.56, 0.64) |
| 2000 | 0.71 (0.67, 0.74) | 0.84 (0.78, 0.90) | 0.61 (0.57, 0.65) |
| 2001 | 0.64 (0.61, 0.67) | 0.72 (0.67, 0.77) | 0.57 (0.53, 0.60) |
| 2002 | 0.65 (0.62, 0.68) | 0.73 (0.68, 0.78) | 0.58 (0.55, 0.62) |
| 2003 | 0.63 (0.60, 0.66) | 0.68 (0.63, 0.73) | 0.59 (0.55, 0.62) |
| 2004 | 0.67 (0.64, 0.70) | 0.72 (0.67, 0.77) | 0.63 (0.59, 0.67) |
| 2005 | 0.69 (0.66, 0.72) | 0.74 (0.69, 0.79) | 0.65 (0.61, 0.69) |
| 2006 | 0.70 (0.67, 0.73) | 0.75 (0.70, 0.80) | 0.69 (0.65, 0.72) |
| 2007 | 0.72 (0.69, 0.76) | 0.75 (0.70, 0.80) | 0.70 (0.66, 0.74) |
| 2008 | 0.74 (0.71, 0.77) | 0.76 (0.71, 0.81) | 0.73 (0.70, 0.77) |
| 2009 | 0.75 (0.72, 0.78) | 0.74 (0.69, 0.79) | 0.73 (0.70, 0.77) |
| 2010 | 0.73 (0.70, 0.76) | 0.75 (0.70, 0.79) | 0.72 (0.69, 0.76) |
| 2011 | 0.75 (0.72, 0.78) | 0.79 (0.74, 0.84) | 0.72 (0.68, 0.75) |
| 2012 | 0.80 (0.77, 0.83) | 0.78 (0.73, 0.83) | 0.80 (0.76, 0.84) |
| 2013 | 1.08 (1.05, 1.12) | 1.06 (1.00, 1.11) | 1.06 (1.02, 1.11) |
| 2014 | 1.13 (1.10, 1.17) | 1.07 (1.02, 1.13) | 1.15 (1.10, 1.19) |
| 2015 | 1.11 (1.08, 1.15) | 1.10 (1.05, 1.16) | 1.13 (1.08, 1.17) |
| 2016 | 1.05 (1.02, 1.09) | 1.04 (0.99, 1.09) | 1.06 (1.02, 1.10) |
| 2017 | 1.10 (1.07, 1.14) | 1.02 (0.97, 1.08) | 1.14 (1.09, 1.18) |
| 2018 | 1.01 (0.98, 1.05) | 0.95 (0.90, 0.99) | 1.03 (0.99, 1.08) |
| 2019 | 1.10 (1.07, 1.13) | 1.07 (1.02, 1.12) | 1.09 (1.05, 1.13) |
| 2020 | 1.37 (1.33, 1.41) | 1.30 (1.24, 1.35) | 1.38 (1.34, 1.43) |
| 2021 | 1.50 (1.46, 1.54) | 1.40 (1.35, 1.46) | 1.56 (1.51, 1.61) |
| 2022 | 1.44 (1.40, 1.48) | 1.37 (1.31, 1.43) | 1.49 (1.44, 1.53) |
| 2023 | 1.40 (1.36, 1.44) | 1.25 (1.20, 1.31) | 1.47 (1.42, 1.52) |
| 2024 | 1.33 (1.30, 1.37) | 1.23 (1.18, 1.29) | 1.41 (1.37, 1.46) |
| 2025 | 1.44 (1.40, 1.48) | 1.36 (1.31, 1.42) | 1.47 (1.43, 1.52) |

*Abbreviations: CI, Confidence Interval*

**Table 2. Age-adjusted mortality rates per 100,000, stratified by race in the United States, 1999 to 2025.**

| **Year** | **Age-Adjusted Mortality Rate (95% CI) NH Asian or Pacific Islander** | **Age-Adjusted Mortality Rate (95% CI) NH Black or African American** | **Age-Adjusted Mortality Rate (95% CI) NH White** | **Age-Adjusted Mortality Rate (95% CI) Hispanic or Latino** |
| --- | --- | --- | --- | --- |
| 1999 | 0.52 (0.35, 0.76) | 0.56 (0.46, 0.66) | 0.70 (0.67, 0.73) | 0.53 (0.40, 0.68) |
| 2000 | 0.37 (0.22, 0.58) | 0.56 (0.47, 0.66) | 0.71 (0.67, 0.74) | 0.64 (0.50, 0.80) |
| 2001 | 0.40 (0.26, 0.59) | 0.67 (0.57, 0.78) | 0.64 (0.61, 0.67) | 0.68 (0.54, 0.84) |
| 2002 | 0.39 (0.25, 0.58) | 0.62 (0.52, 0.73) | 0.66 (0.62, 0.69) | 0.87 (0.70, 1.04) |
| 2003 | 0.43 (0.30, 0.61) | 0.65 (0.55, 0.76) | 0.62 (0.59, 0.65) | 0.91 (0.74, 1.07) |
| 2004 | 0.30 (0.20, 0.45) | 0.76 (0.64, 0.87) | 0.64 (0.61, 0.67) | 1.07 (0.89, 1.24) |
| 2005 | 0.37 (0.25, 0.52) | 0.79 (0.67, 0.90) | 0.67 (0.64, 0.70) | 1.08 (0.91, 1.25) |
| 2006 | 0.26 (0.16, 0.38) | 0.70 (0.60, 0.81) | 0.68 (0.65, 0.71) | 1.75 (1.54, 1.97) |
| 2007 | 0.22 (0.14, 0.34) | 0.74 (0.64, 0.85) | 0.67 (0.64, 0.70) | 1.82 (1.61, 2.03) |
| 2008 | 0.28 (0.19, 0.40) | 0.71 (0.60, 0.81) | 0.69 (0.66, 0.73) | 2.04 (1.82, 2.25) |
| 2009 | 0.27 (0.18, 0.39) | 0.73 (0.63, 0.84) | 0.70 (0.67, 0.74) | 1.72 (1.53, 1.92) |
| 2010 | 0.40 (0.29, 0.53) | 0.74 (0.64, 0.85) | 0.66 (0.63, 0.69) | 2.01 (1.81, 2.22) |
| 2011 | 0.24 (0.16, 0.34) | 0.94 (0.82, 1.05) | 0.65 (0.62, 0.68) | 2.24 (2.04, 2.45) |
| 2012 | 0.44 (0.33, 0.57) | 1.07 (0.95, 1.19) | 0.66 (0.63, 0.69) | 2.47 (2.26, 2.68) |
| 2013 | 1.80 (1.57, 2.03) | 0.95 (0.84, 1.07) | 0.95 (0.91, 0.99) | 2.60 (2.40, 2.81) |
| 2014 | 2.10 (1.86, 2.35) | 0.91 (0.80, 1.02) | 1.00 (0.96, 1.04) | 2.41 (2.22, 2.60) |
| 2015 | 2.30 (2.06, 2.54) | 0.81 (0.71, 0.91) | 1.04 (1.00, 1.08) | 1.71 (1.55, 1.87) |
| 2016 | 2.25 (2.02, 2.48) | 0.76 (0.66, 0.85) | 1.00 (0.97, 1.04) | 1.36 (1.22, 1.49) |
| 2017 | 1.97 (1.76, 2.19) | 0.84 (0.74, 0.94) | 1.08 (1.04, 1.12) | 1.46 (1.32, 1.60) |
| 2018 | 1.51 (1.33, 1.68) | 0.84 (0.74, 0.94) | 0.99 (0.95, 1.02) | 1.45 (1.32, 1.59) |
| 2019 | 1.37 (1.21, 1.54) | 0.96 (0.86, 1.07) | 1.06 (1.02, 1.09) | 1.42 (1.29, 1.55) |
| 2020 | 1.91 (1.72, 2.10) | 1.38 (1.26, 1.50) | 1.32 (1.28, 1.36) | 1.59 (1.45, 1.72) |
| 2021 | 2.05 (1.85, 2.26) | 1.30 (1.17, 1.42) | 1.45 (1.41, 1.50) | 2.18 (2.02, 2.34) |
| 2022 | 2.05 (1.86, 2.24) | 1.22 (1.10, 1.34) | 1.38 (1.34, 1.43) | 1.95 (1.80, 2.09) |
| 2023 | 1.67 (1.50, 1.84) | 1.16 (1.05, 1.28) | 1.39 (1.34, 1.43) | 1.82 (1.68, 1.96) |
| 2024 | 1.63 (1.47, 1.79) | 0.95 (0.85, 1.05) | 1.35 (1.30, 1.39) | 1.78 (1.64, 1.91) |
| 2025 | 1.86 (1.69, 2.04) | 1.02 (0.91, 1.12) | 1.40 (1.36, 1.44) | 1.88 (1.74, 2.02) |

*Abbreviations: CI, Confidence Interval; NH, Non-Hispanic*

**Table 3. Age-adjusted mortality rates per 100,000, stratified by urbanization in the United States, 1999 to 2020.**

| **Year** | **Age-Adjusted Mortality Rate (95% CI) Metropolitan** | **Age-Adjusted Mortality Rate (95% CI) Non-Metropolitan** |
| --- | --- | --- |
| 1999 | 0.66 (0.62, 0.69) | 0.77 (0.69, 0.84) |
| 2000 | 0.69 (0.66, 0.73) | 0.73 (0.66, 0.80) |
| 2001 | 0.64 (0.61, 0.67) | 0.61 (0.55, 0.68) |
| 2002 | 0.64 (0.61, 0.67) | 0.61 (0.55, 0.68) |
| 2003 | 0.66 (0.63, 0.69) | 0.54 (0.48, 0.61) |
| 2004 | 0.69 (0.66, 0.73) | 0.59 (0.52, 0.65) |
| 2005 | 0.74 (0.70, 0.77) | 0.50 (0.44, 0.57) |
| 2006 | 0.77 (0.74, 0.81) | 0.45 (0.39, 0.51) |
| 2007 | 0.77 (0.73, 0.80) | 0.48 (0.42, 0.54) |
| 2008 | 0.83 (0.80, 0.87) | 0.40 (0.34, 0.45) |
| 2009 | 0.81 (0.77, 0.84) | 0.43 (0.38, 0.49) |
| 2010 | 0.79 (0.76, 0.82) | 0.44 (0.38, 0.49) |
| 2011 | 0.83 (0.80, 0.87) | 0.42 (0.37, 0.48) |
| 2012 | 0.87 (0.84, 0.91) | 0.38 (0.33, 0.43) |
| 2013 | 1.23 (1.19, 1.27) | 0.35 (0.30, 0.41) |
| 2014 | 1.27 (1.23, 1.31) | 0.44 (0.39, 0.50) |
| 2015 | 1.27 (1.22, 1.31) | 0.48 (0.43, 0.54) |
| 2016 | 1.17 (1.13, 1.21) | 0.49 (0.43, 0.55) |
| 2017 | 1.22 (1.18, 1.26) | 0.55 (0.49, 0.60) |
| 2018 | 1.10 (1.06, 1.14) | 0.62 (0.55, 0.68) |
| 2019 | 1.16 (1.13, 1.20) | 0.65 (0.59, 0.72) |
| 2020 | 1.49 (1.45, 1.53) | 0.76 (0.69, 0.82) |

*Abbreviations: CI, Confidence Interval*

**Table 4. Age-adjusted mortality rates per 100,000, stratified by census region in the United States, 1999 to 2025.**

| **Year** | **Age-Adjusted Mortality Rate (95% CI) Northeast** | **Age-Adjusted Mortality Rate (95% CI) Midwest** | **Age-Adjusted Mortality Rate (95% CI) South** | **Age-Adjusted Mortality Rate (95% CI) West** |
| --- | --- | --- | --- | --- |
| 1999 | 0.49 (0.43, 0.55) | 0.82 (0.75, 0.89) | 0.67 (0.62, 0.72) | 0.65 (0.58, 0.72) |
| 2000 | 0.54 (0.48, 0.60) | 0.70 (0.63, 0.76) | 0.76 (0.70, 0.81) | 0.66 (0.59, 0.73) |
| 2001 | 0.46 (0.41, 0.52) | 0.66 (0.60, 0.72) | 0.79 (0.73, 0.85) | 0.49 (0.44, 0.55) |
| 2002 | 0.51 (0.45, 0.57) | 0.65 (0.59, 0.71) | 0.81 (0.76, 0.87) | 0.53 (0.47, 0.59) |
| 2003 | 0.44 (0.39, 0.49) | 0.62 (0.56, 0.68) | 0.85 (0.79, 0.90) | 0.46 (0.41, 0.52) |
| 2004 | 0.43 (0.37, 0.48) | 0.60 (0.54, 0.66) | 0.98 (0.92, 1.04) | 0.48 (0.42, 0.54) |
| 2005 | 0.43 (0.38, 0.48) | 0.52 (0.47, 0.58) | 1.11 (1.05, 1.18) | 0.48 (0.43, 0.54) |
| 2006 | 0.34 (0.29, 0.38) | 0.51 (0.45, 0.56) | 1.22 (1.16, 1.29) | 0.49 (0.43, 0.54) |
| 2007 | 0.31 (0.27, 0.36) | 0.51 (0.45, 0.56) | 1.28 (1.22, 1.35) | 0.41 (0.36, 0.46) |
| 2008 | 0.34 (0.30, 0.39) | 0.44 (0.39, 0.49) | 1.39 (1.32, 1.46) | 0.45 (0.40, 0.50) |
| 2009 | 0.30 (0.26, 0.35) | 0.46 (0.41, 0.51) | 1.42 (1.35, 1.49) | 0.42 (0.37, 0.47) |
| 2010 | 0.32 (0.27, 0.36) | 0.42 (0.37, 0.47) | 1.40 (1.33, 1.47) | 0.44 (0.39, 0.49) |
| 2011 | 0.35 (0.30, 0.39) | 0.40 (0.35, 0.44) | 1.42 (1.35, 1.49) | 0.46 (0.41, 0.51) |
| 2012 | 0.30 (0.26, 0.34) | 0.44 (0.40, 0.49) | 1.44 (1.37, 1.50) | 0.61 (0.56, 0.67) |
| 2013 | 0.34 (0.29, 0.38) | 0.39 (0.35, 0.44) | 1.31 (1.25, 1.38) | 2.15 (2.05, 2.26) |
| 2014 | 0.36 (0.31, 0.40) | 0.47 (0.42, 0.52) | 1.19 (1.13, 1.25) | 2.43 (2.33, 2.54) |
| 2015 | 0.39 (0.35, 0.44) | 0.44 (0.39, 0.49) | 1.06 (1.00, 1.11) | 2.62 (2.51, 2.74) |
| 2016 | 0.38 (0.33, 0.43) | 0.50 (0.45, 0.54) | 0.91 (0.86, 0.96) | 2.48 (2.37, 2.58) |
| 2017 | 0.36 (0.31, 0.40) | 0.55 (0.49, 0.60) | 1.17 (1.11, 1.23) | 2.35 (2.24, 2.45) |
| 2018 | 0.38 (0.33, 0.43) | 0.57 (0.52, 0.62) | 1.20 (1.14, 1.26) | 1.72 (1.63, 1.80) |
| 2019 | 0.43 (0.38, 0.48) | 0.59 (0.54, 0.64) | 1.35 (1.29, 1.41) | 1.76 (1.67, 1.85) |
| 2020 | 0.53 (0.48, 0.58) | 0.92 (0.85, 0.98) | 1.66 (1.60, 1.73) | 2.11 (2.01, 2.20) |
| 2021 | 0.55 (0.50, 0.60) | 0.79 (0.73, 0.86) | 1.77 (1.70, 1.84) | 2.61 (2.50, 2.72) |
| 2022 | 0.54 (0.49, 0.60) | 0.64 (0.59, 0.69) | 1.64 (1.58, 1.71) | 2.68 (2.57, 2.79) |
| 2023 | 0.42 (0.38, 0.47) | 0.83 (0.77, 0.90) | 1.56 (1.50, 1.63) | 2.44 (2.34, 2.55) |
| 2024 | 0.44 (0.40, 0.49) | 0.93 (0.87, 1.00) | 1.35 (1.29, 1.41) | 2.44 (2.34, 2.54) |
| 2025 | 0.49 (0.44, 0.55) | 1.12 (1.05, 1.19) | 1.39 (1.33, 1.44) | 2.67 (2.56, 2.77) |

*Abbreviations: CI, Confidence Interval*

**Table 5. Crude mortality rates per 100,000, stratified by age group in the United States, 1999 to 2025.**

| **Year** | **Crude Rate (95% CI) 5-14 years** | **Crude Rate (95% CI) 35-44 years** | **Crude Rate (95% CI) 45-54 years** | **Crude Rate (95% CI) 55-64 years** | **Crude Rate (95% CI) 65-74 years** | **Crude Rate (95% CI) 75-84 years** | **Crude Rate (95% CI) 85+ years** |
| --- | --- | --- | --- | --- | --- | --- | --- |
| 1999 | 0.08 (0.06, 0.12) | 0.09 (0.07, 0.13) | 0.19 (0.14, 0.24) | 0.53 (0.44, 0.63) | 1.68 (1.50, 1.87) | 4.65 (4.26, 5.03) | 14.49 (13.33, 15.65) |
| 2000 | 0.06 (0.04, 0.08) | 0.08 (0.06, 0.11) | 0.19 (0.15, 0.24) | 0.50 (0.41, 0.59) | 1.68 (1.49, 1.87) | 4.80 (4.41, 5.18) | 15.12 (13.95, 16.29) |
| 2001 | 0.06 (0.04, 0.08) | 0.10 (0.07, 0.13) | 0.20 (0.16, 0.25) | 0.52 (0.43, 0.61) | 1.56 (1.38, 1.74) | 3.95 (3.60, 4.29) | 14.49 (13.36, 15.63) |
| 2002 | 0.09 (0.07, 0.13) | 0.06 (0.04, 0.08) | 0.16 (0.12, 0.20) | 0.50 (0.41, 0.58) | 1.48 (1.30, 1.65) | 4.39 (4.02, 4.75) | 15.50 (14.33, 16.66) |
| 2003 | 0.06 (0.04, 0.09) | 0.09 (0.07, 0.13) | 0.20 (0.16, 0.25) | 0.51 (0.43, 0.60) | 1.42 (1.24, 1.59) | 4.04 (3.69, 4.39) | 15.43 (14.28, 16.58) |
| 2004 | 0.09 (0.06, 0.12) | 0.08 (0.06, 0.12) | 0.17 (0.13, 0.21) | 0.48 (0.40, 0.56) | 1.46 (1.28, 1.63) | 4.43 (4.06, 4.79) | 16.52 (15.34, 17.70) |
| 2005 | 0.07 (0.05, 0.10) | 0.10 (0.07, 0.13) | 0.19 (0.15, 0.23) | 0.52 (0.44, 0.60) | 1.55 (1.37, 1.73) | 4.23 (3.88, 4.58) | 18.24 (17.02, 19.46) |
| 2006 | 0.07 (0.03, 0.07) | 0.08 (0.05, 0.11) | 0.20 (0.16, 0.24) | 0.49 (0.41, 0.56) | 1.27 (1.11, 1.42) | 4.64 (4.27, 5.00) | 20.10 (18.84, 21.36) |
| 2007 | 0.06 (0.04, 0.09) | 0.06 (0.04, 0.09) | 0.17 (0.13, 0.21) | 0.45 (0.38, 0.53) | 1.19 (1.04, 1.34) | 4.98 (4.60, 5.36) | 19.82 (18.59, 21.05) |
| 2008 | 0.07 (0.05, 0.10) | 0.05 (0.03, 0.08) | 0.13 (0.10, 0.17) | 0.40 (0.33, 0.47) | 1.18 (1.03, 1.33) | 5.06 (4.67, 5.44) | 23.25 (21.94, 24.56) |
| 2009 | 0.06 (0.04, 0.09) | 0.07 (0.04, 0.09) | 0.12 (0.09, 0.16) | 0.42 (0.36, 0.49) | 1.21 (1.06, 1.35) | 4.74 (4.36, 5.11) | 23.21 (21.93, 24.50) |
| 2010 | 0.05 (0.03, 0.08) | 0.07 (0.05, 0.10) | 0.14 (0.11, 0.18) | 0.44 (0.37, 0.50) | 1.18 (1.03, 1.32) | 4.52 (4.16, 4.89) | 23.32 (22.04, 24.60) |
| 2011 | 0.07 (0.05, 0.10) | 0.06 (0.04, 0.09) | 0.13 (0.10, 0.17) | 0.35 (0.29, 0.41) | 1.18 (1.04, 1.33) | 5.06 (4.68, 5.45) | 23.58 (22.33, 24.84) |
| 2012 | 0.06 (0.02, 0.07) | 0.05 (0.03, 0.08) | 0.16 (0.12, 0.20) | 0.44 (0.37, 0.50) | 1.19 (1.05, 1.33) | 5.22 (4.83, 5.61) | 25.48 (24.19, 26.77) |
| 2013 | 0.05 (0.02, 0.05) | 0.07 (0.05, 0.11) | 0.17 (0.13, 0.21) | 0.38 (0.32, 0.44) | 1.27 (1.13, 1.41) | 7.09 (6.64, 7.54) | 37.98 (36.42, 39.53) |
| 2014 | 0.05 (0.03, 0.08) | 0.06 (0.04, 0.09) | 0.14 (0.11, 0.19) | 0.46 (0.40, 0.53) | 1.36 (1.22, 1.50) | 7.03 (6.59, 7.48) | 40.36 (38.77, 41.94) |
| 2015 | 0.05 (0.03, 0.08) | 0.06 (0.04, 0.09) | 0.11 (0.08, 0.14) | 0.42 (0.35, 0.48) | 1.34 (1.20, 1.48) | 6.89 (6.45, 7.32) | 41.66 (40.06, 43.25) |
| 2016 | 0.06 (0.04, 0.09) | 0.06 (0.04, 0.09) | 0.12 (0.09, 0.15) | 0.43 (0.37, 0.49) | 1.46 (1.32, 1.60) | 6.03 (5.62, 6.43) | 38.68 (37.16, 40.21) |
| 2017 | 0.06 (0.02, 0.06) | 0.05 (0.03, 0.08) | 0.12 (0.09, 0.16) | 0.47 (0.41, 0.54) | 1.40 (1.27, 1.54) | 7.17 (6.74, 7.61) | 40.10 (38.56, 41.64) |
| 2018 | 0.06 (0.04, 0.09) | 0.05 (0.03, 0.07) | 0.09 (0.07, 0.13) | 0.46 (0.39, 0.52) | 1.47 (1.34, 1.61) | 6.35 (5.95, 6.74) | 35.51 (34.07, 36.95) |
| 2019 | 0.05 (0.03, 0.08) | 0.05 (0.03, 0.07) | 0.15 (0.12, 0.19) | 0.48 (0.41, 0.54) | 1.44 (1.31, 1.57) | 6.56 (6.17, 6.96) | 39.80 (38.28, 41.32) |
| 2020 | 0.04 (0.01, 0.04) | 0.06 (0.04, 0.09) | 0.13 (0.10, 0.17) | 0.53 (0.46, 0.60) | 1.80 (1.66, 1.95) | 8.65 (8.20, 9.10) | 50.55 (48.84, 52.26) |
| 2021 | 0.04 (0.02, 0.06) | 0.06 (0.04, 0.08) | 0.15 (0.11, 0.19) | 0.55 (0.48, 0.62) | 1.85 (1.71, 2.00) | 8.91 (8.45, 9.37) | 57.52 (55.59, 59.44) |
| 2022 | 0.04 (0.02, 0.06) | 0.08 (0.05, 0.11) | 0.14 (0.10, 0.18) | 0.50 (0.43, 0.57) | 1.86 (1.71, 2.00) | 8.86 (8.42, 9.30) | 53.72 (51.93, 55.50) |
| 2023 | 0.05 (0.03, 0.08) | 0.06 (0.04, 0.08) | 0.15 (0.12, 0.19) | 0.50 (0.43, 0.57) | 1.76 (1.62, 1.90) | 7.98 (7.57, 8.38) | 53.45 (51.63, 55.27) |
| 2024 | 0.05 (0.03, 0.08) | 0.06 (0.04, 0.08) | 0.09 (0.06, 0.12) | 0.44 (0.37, 0.50) | 1.66 (1.53, 1.80) | 8.36 (7.95, 8.77) | 50.22 (48.49, 51.96) |
| 2025 | 0.04 (0.02, 0.07) | 0.06 (0.04, 0.09) | 0.11 (0.08, 0.15) | 0.51 (0.44, 0.58) | 1.85 (1.71, 1.99) | 8.97 (8.55, 9.39) | 53.63 (51.84, 55.42) |

*Abbreviations: CI, Confidence Interval*

**Table 6. Place of Death.**

| **Place of Death** | **Total Deaths** | **% of Total Deaths** |
| --- | --- | --- |
| Decedent's home | 29,146 | 30.70% |
| Hospice facility | 7,870 | 8.29% |
| Medical Facility - Dead on Arrival | 133 | 0.14% |
| Medical Facility - Inpatient | 13,343 | 14.05% |
| Medical Facility - Outpatient or ER | 1,772 | 1.87% |
| Medical Facility - Status unknown | 24 | 0.03% |
| Nursing home/long term care | 34,436 | 36.27% |
| Other | 8,114 | 8.55% |
| Place of death unknown | 99 | 0.10% |
| **Total** | **94,937** | **100.00%** |

**Table 7. Age-adjusted mortality rates per 100,000, stratified by state in the United States, 1999 to 2025.**

| **State** | **1999–2020 AAMR (95% CI)** | **2021–2025 AAMR (95% CI)** |
| --- | --- | --- |
| Alabama | 0.53 (0.48, 0.57) | 1.18 (1.06, 1.30) |
| Alaska | 0.43 (0.30, 0.59) | Unreliable |
| Arizona | 0.41 (0.38, 0.44) | 1.58 (1.47, 1.69) |
| Arkansas | 0.34 (0.30, 0.39) | 0.28 (0.20, 0.37) |
| California | 1.91 (1.88, 1.94) | 3.57 (3.50, 3.65) |
| Colorado | 0.51 (0.46, 0.55) | 1.03 (0.91, 1.14) |
| Connecticut | 0.28 (0.25, 0.31) | 0.32 (0.25, 0.40) |
| Delaware | 0.37 (0.29, 0.46) | 0.30 (0.18, 0.47) |
| District of Columbia | 0.44 (0.33, 0.57) | N/A |
| Florida | 3.00 (2.96, 3.04) | 2.94 (2.86, 3.02) |
| Georgia | 0.54 (0.51, 0.58) | 0.43 (0.38, 0.49) |
| Hawaii | 0.47 (0.40, 0.55) | 0.47 (0.35, 0.62) |
| Idaho | 0.73 (0.64, 0.82) | 0.62 (0.49, 0.78) |
| Illinois | 0.52 (0.49, 0.54) | 0.60 (0.54, 0.65) |
| Indiana | 0.48 (0.45, 0.52) | 0.43 (0.37, 0.49) |
| Iowa | 0.54 (0.49, 0.59) | 0.46 (0.37, 0.57) |
| Kansas | 0.72 (0.65, 0.78) | 0.61 (0.49, 0.72) |
| Kentucky | 0.41 (0.37, 0.45) | 0.27 (0.21, 0.34) |
| Louisiana | 0.37 (0.33, 0.41) | 0.67 (0.57, 0.77) |
| Maine | 0.71 (0.62, 0.80) | 0.95 (0.77, 1.14) |
| Maryland | 0.39 (0.36, 0.43) | 0.53 (0.45, 0.61) |
| Massachusetts | 0.54 (0.50, 0.57) | 0.42 (0.36, 0.48) |
| Michigan | 0.42 (0.39, 0.45) | 0.74 (0.67, 0.81) |
| Minnesota | 0.77 (0.72, 0.82) | 1.24 (1.13, 1.36) |
| Mississippi | 0.70 (0.64, 0.77) | 1.38 (1.20, 1.56) |
| Missouri | 0.65 (0.61, 0.70) | 2.44 (2.28, 2.59) |
| Montana | 0.65 (0.55, 0.75) | 0.59 (0.43, 0.78) |
| Nebraska | 0.52 (0.45, 0.58) | 0.51 (0.39, 0.66) |
| Nevada | 0.46 (0.40, 0.52) | 0.63 (0.52, 0.75) |
| New Hampshire | 0.42 (0.35, 0.50) | 0.52 (0.39, 0.68) |
| New Jersey | 0.27 (0.25, 0.30) | 0.46 (0.40, 0.51) |
| New Mexico | 0.41 (0.35, 0.47) | 0.52 (0.40, 0.66) |
| New York | 0.27 (0.25, 0.28) | 0.34 (0.31, 0.38) |
| North Carolina | 0.47 (0.44, 0.50) | 0.43 (0.38, 0.48) |
| North Dakota | 0.51 (0.41, 0.63) | 0.55 (0.36, 0.81) |
| Ohio | 0.56 (0.53, 0.59) | 0.66 (0.60, 0.72) |
| Oklahoma | 0.37 (0.33, 0.41) | 0.48 (0.39, 0.57) |
| Oregon | 0.59 (0.54, 0.63) | 1.46 (1.32, 1.61) |
| Pennsylvania | 0.55 (0.53, 0.58) | 0.72 (0.67, 0.78) |
| Rhode Island | 0.47 (0.38, 0.55) | 0.40 (0.27, 0.57) |
| South Carolina | 0.72 (0.67, 0.78) | 1.42 (1.28, 1.55) |
| South Dakota | 0.52 (0.43, 0.62) | 0.50 (0.33, 0.72) |
| Tennessee | 0.56 (0.52, 0.60) | 1.75 (1.61, 1.88) |
| Texas | 0.98 (0.95, 1.01) | 1.85 (1.78, 1.92) |
| Utah | 0.74 (0.66, 0.82) | 2.38 (2.12, 2.64) |
| Vermont | 0.83 (0.68, 0.98) | 0.95 (0.68, 1.29) |
| Virginia | 0.39 (0.36, 0.42) | 0.65 (0.58, 0.72) |
| Washington | 0.64 (0.60, 0.68) | 3.22 (3.05, 3.39) |
| West Virginia | 1.12 (1.02, 1.21) | 3.48 (3.16, 3.81) |
| Wisconsin | 0.62 (0.58, 0.66) | 1.20 (1.09, 1.31) |
| Wyoming | 0.53 (0.40, 0.67) | 0.62 (0.39, 0.94) |

*Abbreviations: CI, Confidence Interval
* Indicates suppressed/unreliable estimate due to small counts*

**Table 8. Total Deaths, population, AAPC and AAPC p values.**

| **Category** | **Total Deaths (1999–2025)** | **Population (1999–2025)** | **AAPC (95% CI)** | **AAPC p-value** |
| --- | --- | --- | --- | --- |
| Overall | 94,938 | 8,426,674,820 | 3.0148* (0.8443, 5.2319) | 0.006260 |
| **Sex** | | | | |
| Male | 37,177 | 4,149,446,302 | 2.0272 (-0.2890, 4.3972) | 0.086730 |
| Female | 57,761 | 4,277,228,518 | 3.5678* (1.9488, 5.2125) | 0.000013 |
| **Race/Ethnicity** | | | | |
| NH Asian or Pacific Islander | 4,999 | 462,823,040 | 5.6886 (-2.5263, 14.5959) | 0.180193 |
| NH Black or African American | 7,259 | 1,076,077,095 | 2.1710 (-1.0972, 5.5471) | 0.195379 |
| NH White | 71,040 | 5,373,539,687 | 2.7332* (1.0079, 4.4879) | 0.001805 |
| Hispanic or Latino | 11,128 | 1,394,229,761 | 4.3611* (0.4816, 8.3905) | 0.027207 |
| **Census Region** | | | | |
| Northeast | 7,738 | 1,499,844,553 | -0.2721 (-1.3970, 0.8655) | 0.637747 |
| Midwest | 13,122 | 1,811,852,704 | 1.2400* (0.1023, 2.3907) | 0.032568 |
| South | 42,738 | 3,149,216,278 | 2.7369* (1.1030, 4.3972) | 0.000963 |
| West | 31,340 | 1,965,761,285 | 5.4229 (-4.3972, 16.2518) | 0.289794 |
| **Age Group** | | | | |
| 5–14 years | 612 | 1,107,046,640 | -2.0774* (-2.8628, -1.2857) | 0.000014 |
| 35–44 years | 776 | 1,153,855,648 | -1.6791* (-2.4608, -0.8911) | 0.000191 |
| 45–54 years | 1,670 | 1,130,750,794 | -2.1195* (-2.8360, -1.3977) | 0.000003 |
| 55–64 years | 4,560 | 976,491,209 | -0.1852 (-0.8990, 0.5337) | 0.612660 |
| 65–74 years | 10,266 | 683,488,110 | 0.4958 (-0.2881, 1.2858) | 0.215798 |
| 75–84 years | 24,396 | 389,198,776 | 3.3221* (2.7689, 3.8783) | < 0.000001 |
| 85+ years | 51,102 | 151,040,781 | 5.1730* (3.2159, 7.1673) | < 0.000001 |
| **Urbanization** | | | | |
| Metropolitan | 58,586 | 5,739,475,649 | 3.9836* (2.1204, 5.8809) | 0.000023 |
| Non-Metropolitan | 6,804 | 1,006,871,652 | 0.0784 (-0.8513, 1.0168) | 0.869324 |

*Abbreviations: AAPC, Average Annual Percentage Change; CI, Confidence Interval; NH, Non-Hispanic.
* Indicates AAPC significantly differs from zero at the alpha = 0.05 level.*
